# Supplementary material for: Orphan Nuclear Receptor 4A1 (NR4A1) and NR4A2 are Endogenous Regulators of CD71 and Their Ligands Induce Ferroptosis in Breast Cancer
Source: Research Square preprint supplement (doi:10.21203/rs.3.rs-6214709/v1), 2025-04-21
Supplement: Supplementary file 1 [file 30f27e1f264bcdc1081064f8.docx]

**SUPPLEMENTARY MATERIAL**

Manuscript Title: **ORPHAN NUCLEAR RECEPTOR 4A1 (NR4A1) AND NR4A2 ARE ENDOGENOUS REGULATORS OF CD71 AND THEIR LIGANDS INDUCE FERROPTOSIS IN BREAST CANCER**

Arafat Rahman Oany1, Srijana Upadhyay1, Wai Ning Tiffany Tsui1, Amanuel Hailemariam1, Sarah Latka2, John Landua5, Sandra D. Scherer3, Alana L. Welm3, Hugo Villanueva2,4, Michael T. Lewis2,5 and Stephen Safe1*.

1Department of Veterinary Physiology and Pharmacology, College of Veterinary Medicine, Texas A&M University, College Station, TX 77843 USA

2Advanced Technology Cores, Baylor College of Medicine, Houston, TX 77030 USA

3Department of Oncological Sciences, Huntsman Cancer Institute, University of Utah, Salt Lake City, UT 84112 USA

4Otolaryngology – Head and Neck Surgery, Baylor College of Medicine, Houston, TX 77030 USA

5Breast Center, Baylor College of Medicine, Houston, TX 77030 USA

**Table of Content**

Cover Page……………………………………………………………………………………………………Pg 1

Table of Content………………………………………………………………………………………………Pg 1

Supplementary Table 1………………………………………………………………………………………Pg 2

Supplementary Table 2………………………………………………………………………………………Pg 3

**Supplementary Table1**

| **Antibody** | **Source** | **Catalog No./Identifier** | **WB Dilution** |
| --- | --- | --- | --- |
| GAPDH (D16H11) XP® Rabbit mAb | Cell Signaling | 5174 | 1:1000 |
| EGFR | Santa Cruz Biotechnology | c-373746 | 1:500 |
| Integrin β1 (D2E5) Rabbit mAb | Cell Signaling | 9699 | 1:1000 |
| c-Myc | Cell Signaling | 9402 | 1:500 |
| Cleaved PARP (Asp214) | Cell Signaling | 9541 | 1:1000 |
| Caspase-3 | Cell Signaling | 9662 | 1:1000 |
| GPX4 (E5Y8K) Rabbit mAb | Cell Signaling | 59735 | 1:500 |
| xCT/SLC7A11 (D2M7A) Rabbit mAb | Cell Signaling | 12691 | 1:500 |
| CD71/TFRC (H68.4) | Santa Cruz Biotechnology | sc-65882 | 1:1000 |
| β-Actin | Sigma | A5316 | 1:1000 |
| NR4A1 | Abcam | Ab283264 | 1:500 |
| NR4A2 | Santa Cruz Biotechnology | sc-376984 | 1:1000 |
| Sp1 (both ChIP and western) | Santa Cruz Biotechnology | Sc-17824 | 1:500 |
| Sp3 | Santa Cruz Biotechnology | Sc-644 | 1:500 |
| Sp4 (both ChIP and western) | Santa Cruz Biotechnology | Sc-390124 | 1:500 |
| Bcl-2 (D17C4) Rabbit mAb | Cell Signaling | 3498 | 1:500 |
| NR4A1 (for ChIP) | Santa Cruz | Sc-365113 X | N/A |
| Mouse IgG (for ChIP) | Santa Cruz | Sc-2025 | N/A |

**Supplementary Table2**

| **Primer** | **Sequence** |
| --- | --- |
| TFRC (CD71) (Binding Site 1) | Forward: 5’ GAGCCCAGGAGTTCAAGACTA 3’  Reverse: 5’ ATTCCTGACCTCAGGTGATCT 3’ |
| TFRC (CD71) (Binding Site 2) | Forward: 5’ TACGTGCCTCAGGAAGTGAC 3’  Reverse: 5’ AGTGGCAGAAACAGTGGATG 3’ |
| TFRC (CD71) (Binding Site 3) | Forward: 5’ GTACGTGCCTCAGGAAGTGA 3’  Reverse: 5’ GAAATGACAACGAGGGGATG 3’ |
